# Supplementary material for: Characterization of Systemic and Culprit-Coronary Artery miR-483-5p Expression in Chronic CAD and Acute Myocardial Infarction Male Patients
Source: MDPI journal article supplement (doi:10.3390/ijms24108551), 2023-05-10
Supplement: s1 [file s1]

## Supplementary Materials:

**Supplementary Table S1:** Differentially expressed miRNAs detected by NGS analysis in sera from STEMI patients *versus* patent controls. Fold change and log2 fold change values, as well as *p*-values are shown for each of the 15 miRNAs. NGS: Next Generation Sequencing; RPM: reads per million; STEMI ST-elevation myocardial infarction.

| miRNA           | mean<br>expression<br>(RPM) | log2 fold<br>change | Fold<br>Change | <i>p</i> Value |
|-----------------|-----------------------------|---------------------|----------------|----------------|
| hsa-miR-1-3p    | 285.58                      | 1.78                | 3.44           | 0.0023         |
| hsa-miR-150-5p  | 14736.14                    | 1.19                | 2.28           | 0.0031         |
| hsa-miR-483-5p  | 1259.12                     | -0.97               | 0.51           | 0.0041         |
| hsa-miR-1229-5p | 92.82                       | 3.51                | 11.38          | 0.0064         |
| hsa-miR-4723-5p | 125.51                      | 5.57                | 47.59          | 0.0068         |
| hsa-miR-1299    | 29.87                       | 2.15                | 4.43           | 0.0101         |
| hsa-miR-3168    | 530.26                      | 1.16                | 2.23           | 0.0109         |
| hsa-miR-2467-5p | 1040.32                     | -1.03               | 0.49           | 0.0146         |
| hsa-miR-122-5p  | 27183.72                    | -0.69               | 0.62           | 0.0232         |
| hsa-miR-361-3p  | 1507.20                     | 0.76                | 1.69           | 0.0274         |
| hsa-miR-29a-3p  | 4190.70                     | 0.70                | 1.63           | 0.0278         |
| hsa-miR-29b-3p  | 237.73                      | 1.06                | 2.09           | 0.0347         |
| hsa-miR-643     | 82.72                       | 2.85                | 7.2            | 0.0411         |
| hsa-miR-4786-3p | 64.04                       | 4.17                | 17.98          | 0.0469         |
| hsa-miR-142-5p  | 5919.69                     | 0.70                | 1.63           | 0.0473         |
